# Supplementary material for: Evaluation of the cognitive-motor performance of adults with Duchenne Muscular Dystrophy in a hand-related task
Source: PubMed Central journal article supplement (PMC6993979; doi:10.1371/journal.pone.0228128), 2020-01-31
Supplement: pone.0228128.s002.pdf [file pone.0228128.s002.pdf]

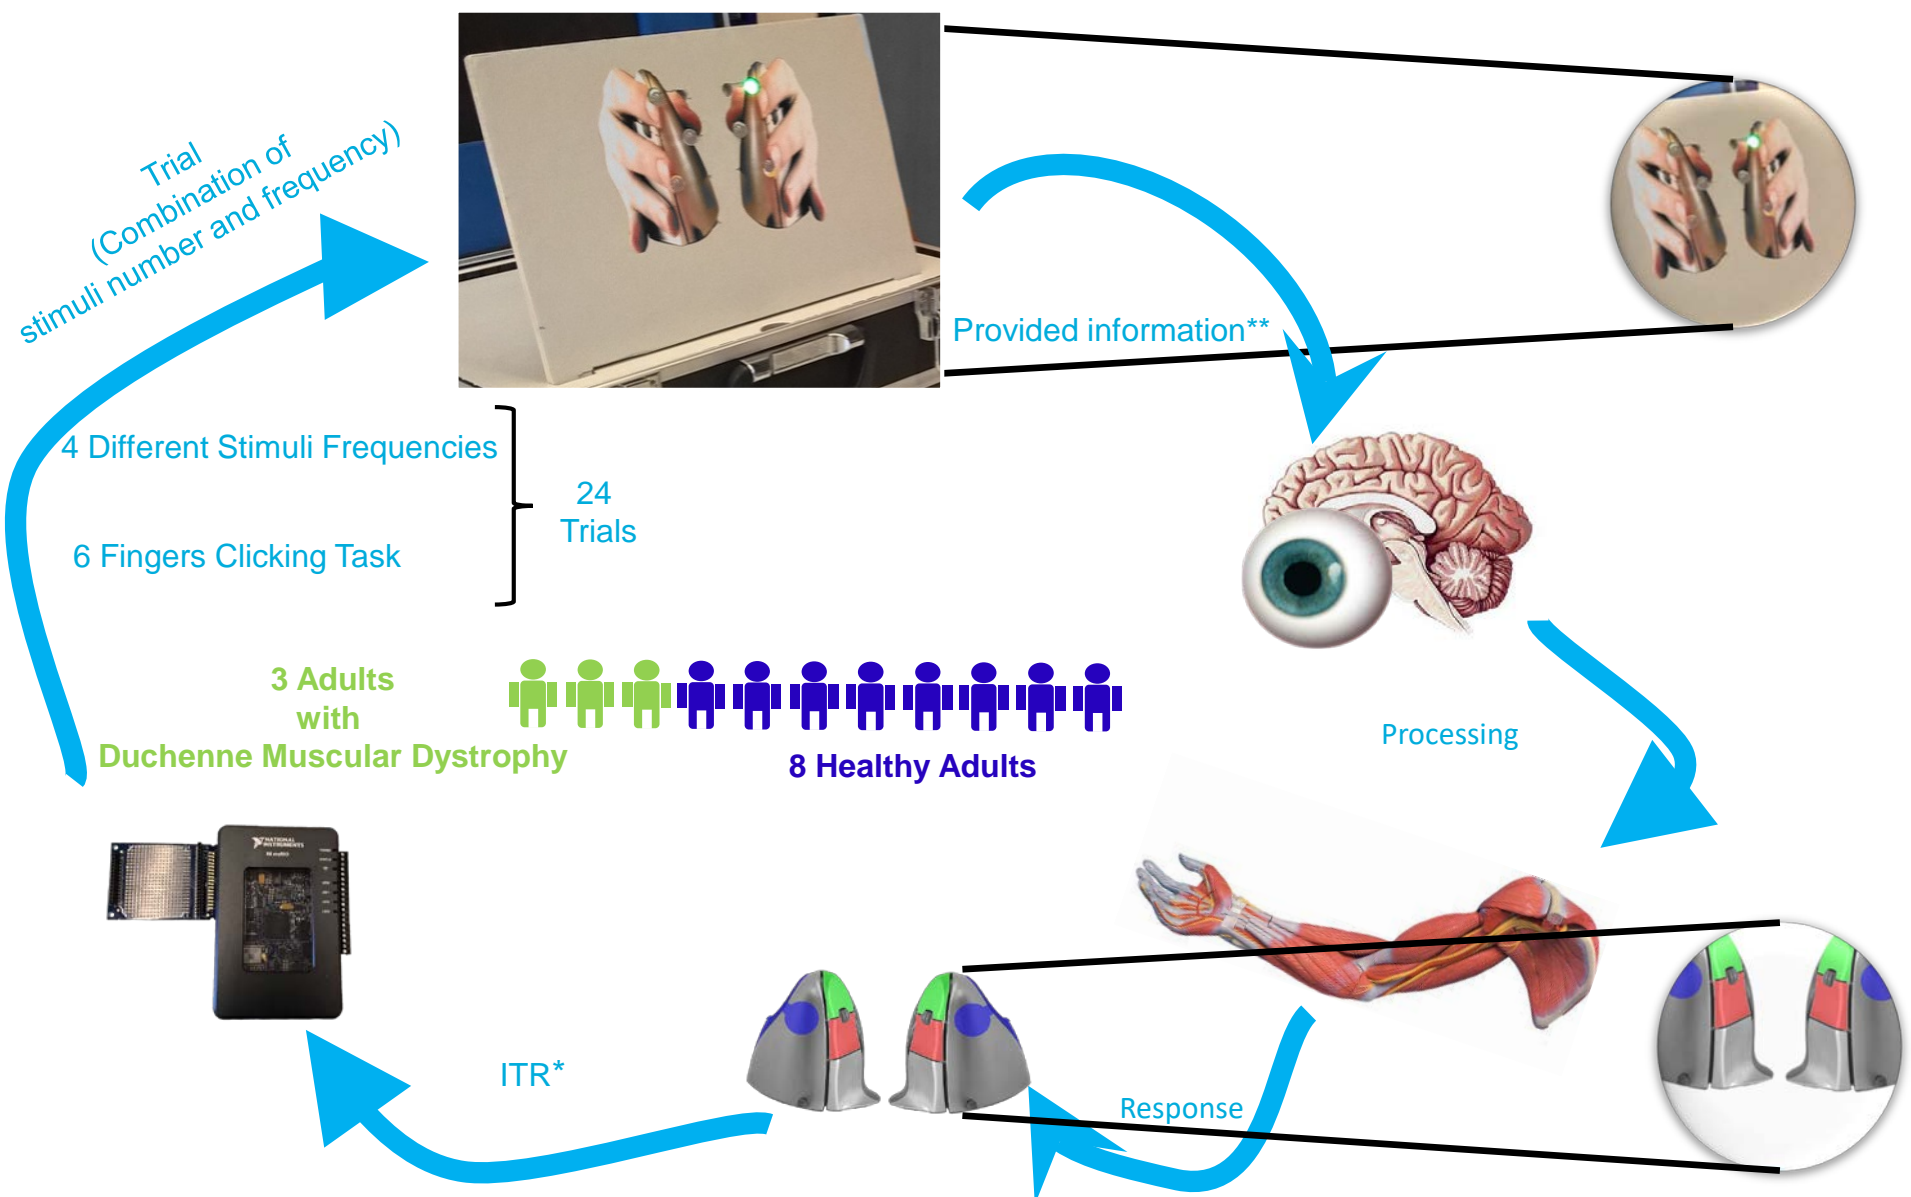

\*ITR = Information Transfer Rate

\*\*Provided information = number of stimuli \* frequency of stimulus  
i.e. 2 fingers clicking at 2 Hz equals provided information of 4 bits/sec
